# Supplementary material for: Single transcript level atlas of oxytocin and the oxytocin receptor in the mouse brain
Source: eLife. 2026 Feb 23;15:e95215. doi: 10.7554/eLife.95215 (PMC13008351; doi:10.7554/eLife.95215)
Supplement: Figure 1—figure supplement 1—source data 1. [file elife-95215-fig1-figsupp1-data1.xlsx]

## Sheet: Brain regions
Brain regions	Oxtr transcript number
Hypothalamus	58664
Cerebral cortex	57303
Hippocampus	21709
Olfactory bulb	15183
Midbrain & pons	13608
Thalamus	12446
Medulla	8648
Forebrain	3706
Cerebellum	2386
Ventricular regions	533

## Sheet: Hypothalamus
Brain nuclei	Oxtr transcript number
AHiPM	9546
MePV	8932
PMCo	6314
ACo	4062
LH	3466
PLCo	2739
TC	2418
BMA	2232
BLA	1472
BMP	1270
AHC	1245
MePD	1151
CxA	1031
ZIV	907
APir	900
ZID	795
LaDL	703
SuMM	599
DM	569
BLP	505
SuML	498
AHiAL	486
VMHC	461
SLEAC	451
LA	444
MeAD	438
SLEAM	427
LaVM	348
CeC	319
VMHVL	294
MM	275
Arc	268
CeM	267
I	249
BLV	247
VMHDM	243
ns	226
PaLM	198
SubI	131
LM	126
AAD	115
CeL	107
cp	103
AHP	93
ML	85
PaMM	80
CeMPV	74
IM	70
LaVL	68
ZI	67
opt	61
La	56
MMn	54
SCh	53
PH	49
MCLH	49
PMD	30
SPa	28
FF	26
AStr	23
mt	21
ArcMP	21
PaMP	19
PaDC	15
PSTh	12
VTM	10
sumx	10
PR	5
pm	3
mtg	3
ME	2

## Sheet: Cerebral cortex
Brain nuclei	Oxtr transcript number
Pir	13589
MEnt	3439
S2	3408
S1BF	3022
Gl	2619
Ect	2347
DEn	2195
V1	1703
PRh	1693
FrA	1680
LEnt	1490
AuV	1318
Au1	1255
AIP	1255
TeA	1138
RSG	1135
AuD	1050
VEn	1042
V2L	1022
S1HL	1021
LO	931
CI	904
V2MM	853
RSA	750
DI	689
S1FL	679
S1Tr	631
V2ML	625
M1	512
Cg/RS	506
S1ShNc	429
VO	421
M2	385
S1	368
DLO	341
MO	339
S1DZ	289
PrL	140
LPtA	61
MPtA	29

## Sheet: Hippocampus
Brain nuclei	Oxtr transcript number
Py	12755
GrDG	1442
Or	1326
SLu	1325
CA1	908
PoDG	854
DG	761
CA3	620
LMol	550
Mol	266
fi	228
CA2	219
f	209
S	208
vhc	38

## Sheet: Olfactory bulb
Brain nuclei	Oxtr transcript number
GrO	8003
LOT	1436
EPIA	1131
GrA	802
lo	786
AOL	758
EPI	562
Mi	447
AOE	412
vn	255
AOB	163
AOD	155
MiA	134
AOM	63
ON	48
GIA	24
AOV	4

## Sheet: Midbrain and pons
Brain nuclei	Oxtr transcript number
CIC	1237
VTA	1119
DpMe	1003
VLPAG	792
LDTg	727
DMTg	529
RC	527
CnF	509
PnO	502
ECIC	477
SNC	449
SNR	440
PnC	422
DCIC	379
DTgP	346
LPBC	323
Mo5	280
DRD	273
MPB	239
MGV	203
DRC	197
IPI	176
SubCD	173
MnR	158
scp	157
P5	143
Su5	137
DRV	128
PAG	120
DRI	116
LPAG	107
DTgC	97
IPF	89
PMnR	88
PPTg	85
SubCV	82
ml	75
LDTgV	74
PnR	57
Acs5	46
I5	42
RPF	38
PnV	37
ts	32
SPTg	32
MiTg	31
LPBD	30
RtTg	29
LPBV	28
PCom	26
KF	24
VTg	23
mlf	22
InCo	21
Tz	18
Me5	17
MCPC	15
pc	10
LPBE	10
xscp	9
PC5	9
RtTgP	7
DMPAG	7
LPBS	4
Sag	3
EMi	3

## Sheet: Thalamus
Brain nuclei	Oxtr transcript number
PVA	1081
LGP	967
PV	580
Po	580
ic	575
Rt	426
pv	401
VPM	396
DLG	373
VLGPC	350
AM	348
CM	339
IMD	335
PF	334
VLGMC	286
APTD	271
SubG	265
Re	264
PR	264
AVVL	244
PT	201
MD	188
VM	182
VL	177
LPMR	174
IAD	165
PC	139
VA	137
MDM	132
MHb	125
AMV	123
AVDM	122
IGL	119
LDVL	102
IAM	98
VPL	96
Sub	95
SPF	94
fr	90
VRe	87
SPFPC	84
Eth	83
F	82
PrC	79
Xi	73
CL	71
LPLR	62
LHb	62
AD	55
LDDM	53
RI	46
OPT	40
MDL	39
MGP	35
APTV	29
REth	28
STh	26
MPT	24
MDC	24
sm	17
Ang	17
PVP	14
IMA	14
eml	14
PPT	13
str	9
LPMC	9
Sc	8
Rh	8
VLG	3

## Sheet: Medulla
Brain nuclei	Oxtr transcript number
Sp5I	1563
sp5	1513
10N	859
MdD	432
IRt	359
vsc	331
PCRt	312
LRt	265
12N	241
AP	230
LPGI	210
RVL	175
icp	173
Pr5VL	160
SpVe	140
ECu	133
MdV	129
SolIM	125
In	117
Cu	91
SolM	90
RPO	87
Amb	85
SolG	81
Pr5DM	76
Gi	56
Pr5	53
PMn	47
DMSp5	47
MVe	46
s5	45
SolVL	44
SolC	41
Pr	40
lfp	36
PL	33
PSol	24
ILL	24
SolV	17
RMg	16
LSO	16
DPO	12
SolDL	11
LVPO	10
py	9
MVPO	7
IOBe	7
ml	6
SPO	5
DLL	4
VCA	3
SolI	2
SolDM	2
IOK	2
IOC	2
SolCe	1
RPa	1
IOD	1
7N	1

## Sheet: Forebrain
Brain nuclei	Oxtr transcript number
CPu	1632
aci	1297
BSTIA	388
IPAC	275
MCPO	38
SFO	31
BSTS	27
st	18

## Sheet: Cerebellum
Brain nuclei	Oxtr transcript number
Sim	805
FI	375
Ant	308
7Cb	252
PFI	196
6Cb	160
Crus2	157
mcp	43
PM	41
9Cb	41
Crus1	8

[truncated: 1 more sheets: Ventricular system]
