# Supplementary material for: Single transcript level atlas of oxytocin and the oxytocin receptor in the mouse brain
Source: eLife. 2026 Feb 23;15:e95215. doi: 10.7554/eLife.95215 (PMC13008351; doi:10.7554/eLife.95215)
Supplement: Figure 1—source data 1. [file elife-95215-fig1-data1.xlsx]

## Sheet: Brain regions
Brain regions	Oxtr density (transcript/μm2, x 10-3)
Ventricular regions	30.2098
Hypothalamus	10.5655
Olfactory bulb	6.67745
Hippocampus	5.17122
Cerebral cortex	4.33736
Medulla	2.65046
Midbrain & pons	1.57039
Forebrain	1.54248
Thalamus	1.47293
Cerebellum	0.410463

## Sheet: Ventricular system
Brain nuclei	Oxtr density (transcript/μm2, x 10-3)
3V	34.7286
OV	13.5485

## Sheet: Hypothalamus
Brain nuclei	Oxtr density (transcript/μm2, x 10-3)
AHiPM	123.802
MePV	82.1349
PMCo	23.9183
SuMM	19.638
PLCo	16.158
Arc	16.1305
SuML	16.1011
ACo	15.7559
I	14.7962
IM	14.7791
APir	13.8037
sumx	13.1969
BMP	13.1692
VTM	12.3878
VMHC	12.1611
mtg	12.1422
CxA	11.8683
MePD	10.3681
AHiAL	9.9411
LaVM	9.87546
SCh	9.43431
VMHVL	9.33846
DM	9.18694
ns	8.97788
VMHDM	8.531
BMA	8.50539
ArcMP	8.01698
MeAD	7.56591
pm	7.28532
BLA	6.88874
MM	6.75148
CeC	6.41489
AHP	6.40957
AHC	5.9552
LM	5.88562
PMD	5.62937
SubI	5.61561
CeMPV	5.58334
PaDC	5.26301
LH	5.20978
BLV	5.01267
TC	5.00435
CeL	4.91852
LaDL	4.77477
CeM	4.72091
PaLM	4.6647
MMn	4.62649
ZIV	4.37615
ML	4.01368
PH	4.00113
BLP	3.96485
La	3.71497
SLEAM	3.52638
AAD	3.47202
SLEAC	3.29213
ZID	3.25101
LaVL	2.87838
PaMM	2.82654
LA	2.80591
MCLH	2.78493
SPa	2.72809
AStr	2.62178
PSTh	2.15822
ZI	2.11818
PaMP	1.95144
mt	1.73429
FF	1.52852
cp	0.745335
PR	0.558519
ME	0.543177
opt	0.400259

## Sheet: Olfactory bulb
Brain nuclei	Oxtr density (transcript/μm2, x 10-3)
vn	89.2133
EPIA	72.4939
MiA	37.6565
GrA	16.7405
lo	15.9738
AOE	8.45593
GrO	8.36374
LOT	8.28685
AOL	7.77811
GIA	7.15872
AOB	5.8967
Mi	4.28276
AOD	2.66874
AOM	1.72476
EPI	1.01274
ON	0.617027
AOV	0.256143

## Sheet: Hippocampus
Brain nuclei	Oxtr density (transcript/μm2, x 10-3)
SLu	52.1843
Py	27.7762
f	10.625
S	9.80027
PoDG	6.5336
GrDG	6.49413
DG	4.18664
CA2	4.09176
CA3	2.18707
LMol	2.06561
CA1	1.49853
Or	1.35887
vhc	0.819833
Mol	0.673729
fi	0.445446

## Sheet: Cerebral cortex
Brain nuclei	Oxtr density (transcript/μm2, x 10-3)
C1	14.5628
DEn	12.7112
AIP	12.2042
VEn	9.61895
DI	8.08786
LEnt	6.99912
Pir	6.81359
V1	6.47794
Ect	5.92042
AuD	5.83604
M1	5.50158
PRh	5.31103
Gl	5.24434
S1	4.93431
V2MM	4.85652
V2L	4.55386
V2ML	4.38298
Au1	4.36869
S2	4.33658
S1ShNc	4.18856
M2	3.94489
S1FL	3.92023
S1DZ	3.88835
TeA	3.73599
DLO	3.63329
PrL	3.52459
AuV	3.34191
RSG	3.07931
VO	3.0628
MO	2.94708
Cg/RS	2.76344
S1HL	2.58832
LO	2.43617
S1Tr	2.39199
S1BF	2.35578
FrA	2.33619
RSA	2.32098
MEnt	2.26891
LPtA	1.99016
MPtA	0.802873

## Sheet: Medulla
Brain nuclei	Oxtr density (transcript/μm2, x 10-3)
10N	45.3152
RVL	26.7955
SpVe	20.9091
SolIM	13.8772
LPGi	13.3083
sp5	10.1215
vsc	10.0613
Amb	9.99515
SolM	8.97339
SolC	8.64167
DMSp5	8.09481
SolG	7.67708
AP	7.21569
PCRt	7.17087
ECu	6.81768
Pr	5.64098
In	5.41245
IOC	4.58113
MVe	4.55952
Gi	4.48821
12N	3.66621
Sp5I	3.60386
SolV	3.39491
SolI	2.79131
SolVL	2.73835
PL	2.73772
icp	2.55118
PSol	2.54039
SolDM	2.13021
LRt	2.11735
ILL	1.70386
SolCe	1.68611
Cu	1.64513
IRt	1.63414
SolDL	1.60534
MdD	1.22792
IOBe	1.1422
py	0.921248
ml	0.882909
IOK	0.867039
lfp	0.842406
7N	0.798684
PMn	0.782071
LVPO	0.725643
MdV	0.718159
Pr5DM	0.713786
RPO	0.595366
s5	0.47903
MVPO	0.477243
RMg	0.460612
Pr5VL	0.431376
DPO	0.382262
LSO	0.361646
RPa	0.331985
Pr5	0.319807
IOD	0.205415
DLL	0.189539
VCA	0.125803
SPO	0.0730709

## Sheet: Midbrain and pons
Brain nuclei	Oxtr density (transcript/μm2, x 10-3)
IPF	14.1818
DTgP	13.5981
SNC	11.3698
VTA	8.92833
DRC	8.4538
RC	6.95789
DRV	6.45584
DTgC	5.82096
MGV	5.77523
DRI	5.28222
PC5	4.62966
Acs5	4.48907
pc	4.39935
DRD	4.32102
MnR	4.1972
LDTg	4.13289
MCPC	3.84247
RPF	3.13667
PnR	3.09091
VLPAG	3.08644
PCom	2.94769
Me5	2.36946
VTg	2.3076
scp	2.19938
SNR	2.18906
LPBD	2.17823
P5	1.80253
DMTg	1.79287
IPI	1.74451
DMPAG	1.72024
LDTgV	1.70791
MPB	1.6632
DpMe	1.55778
KF	1.55475
CnF	1.51568
LPBC	1.46516
Su5	1.46368
DCIC	1.40783
PPTg	1.31202
LPBE	1.26458
PAG	1.23157
CIC	1.22487
LPAG	1.21151
mlf	1.09819
SubCD	1.01666
ml	0.979303
SPTg	0.922098
Mo5	0.90436
PMnR	0.901119
LPBV	0.865597
ts	0.84821
InCo	0.718748
MiTg	0.657104
LPBS	0.655645
ECIC	0.628599
PnO	0.563388
I5	0.516021
Tz	0.511368
SubCV	0.510441
PnC	0.501231
PnV	0.444205
Sag	0.434088
RtTg	0.39288
RtTgP	0.385102
xscp	0.347519
EMi	0.104027

## Sheet: Forebrain
Brain nuclei	Oxtr density (transcript/μm2, x 10-3)
aci	20.6204
BSTIA	15.924
SFO	4.94534
MCPO	4.23229
IPAC	2.67572
st	1.23388
CPu	0.770926
BSTS	0.410289

## Sheet: Thalamus
Brain nuclei	Oxtr density (transcript/μm2, x 10-3)
PV	12.353
Xi	12.0247
PVA	10.6616
SPF	7.85923
PT	6.69449
IMD	6.63226
MD	6.41281
IAM	6.34856
VLGPC	5.92263
VRe	5.62097
IGL	5.38323
SubG	4.85238
Sc	4.69264
PR	3.94331
SPFPC	3.65411
CM	3.40599
REth	3.37619
AMV	3.27532
VLGMC	3.2284
MPT	3.14701
RI	3.08736
F	3.03257
PVP	2.95583
fr	2.84225
AM	2.8373
IAD	2.45568
AVVL	2.09148
PrC	2.0463
Ang	2.0313
MHb	1.92341
pv	1.91555
OPT	1.90904
PC	1.8848
Sub	1.79167
Eth	1.54595
LGP	1.53993
PPT	1.50763
Re	1.4994
DLG	1.44037
AVDM	1.43252
PF	1.31926
str	1.31031
APTD	1.30253
STh	1.09788
VLG	1.03761
VA	0.923168
LHb	0.902061
VM	0.888626
AD	0.880174
MDM	0.836498
MDL	0.779486
sm	0.769214
Po	0.759461
APTV	0.724386
VPM	0.678657
VL	0.674402
Rt	0.648807
CL	0.646326
eml	0.644814
LPMR	0.641601
ic	0.628885
LDVL	0.624542
IMA	0.574439
LDDM	0.550402
LPLR	0.524914
VPL	0.49589
MGP	0.491782
Rh	0.434541
MDC	0.373538
LPMC	0.329728

[truncated: 1 more sheets: Cerebellum]
