# Supplementary material for: Single transcript level atlas of oxytocin and the oxytocin receptor in the mouse brain
Source: eLife. 2026 Feb 23;15:e95215. doi: 10.7554/eLife.95215 (PMC13008351; doi:10.7554/eLife.95215)
Supplement: Figure 2—figure supplement 1—source data 1. [file elife-95215-fig2-figsupp1-data1.xlsx]

## Sheet: Brain regions
Brain regions	Oxtr transcript number
Cerebral cortex	29611
Hippocampus	15794
Olfactory bulb	12399
Hypothalamus	9421
Cerebellum	5051
Medulla	4028
Thalamus	2461
Forebrain	1665
Midbrain & pons	1198
Ventricular regions	53

## Sheet: Cerebral cortex
Brain nuclei	Oxtr transcript number
Pir	5330
S1BF	3156
S1Tr	2611
S2	1804
RSA	1535
AIP	1240
PRh	1217
V1	1216
Ect	1208
S1HL	1022
RSG	857
V2L	641
TeA	629
AuV	577
FrA	557
Au1	543
M2	521
V2ML	504
S1FL	494
LPtA	492
V2MM	471
DI	392
AuD	382
DEn	344
M1	340
S1DZ	258
MPtA	226
LO	210
Cg/RS	187
Gl	159
LEnt	153
VO	82
Cg1	59
PrL	55
S1ShNc	46
VEn	37
MO	30
CI	15
Cg2	11

## Sheet: Hippocampus
Brain nuclei	Oxtr transcript number
Py	12247
GrDG	1269
PoDG	801
CA3	458
Or	341
SLu	301
fi	131
dhc	67
S	66
LMol	39
CA2	22
CA1	19
DG	17
f	8
Mol	8

## Sheet: Olfactory bulb
Brain nuclei	Oxtr transcript number
GrO	5659
AOL	2200
G1	2047
AOD	1137
AOM	388
AOE	329
AOV	240
lo	163
EPI	126
Mi	41
AOB	23
GrA	18
dlo	16
MiA	8
GIA	3
EPIA	1

## Sheet: Hypothalamus
Brain nuclei	Oxtr transcript number
PMCo	4210
AHiPM	1143
APir	592
TC	407
BLA	398
SO	364
LH	301
VMHVL	297
MPA	152
ACo	149
DM	126
MePV	111
BMA	100
LaDL	86
PLCo	82
CeL	77
CeMPV	69
Arc	64
ns	54
CeC	52
LaVL	49
VMHC	49
VMHDM	39
CxA	35
AHP	35
ZIV	34
LA	33
PaV	32
BLP	26
I	25
PR	20
cp	20
SuML	18
PaMM	17
SubI	17
PH	16
AHA	16
BMP	15
PaAP	14
RCh	12
SuMM	12
MePD	11
BLV	10
ZID	8
AStr	5
ZI	5
mtg	3
mt	3
IM	2
La	2
MeAD	2
PaLM	1
MM	1

## Sheet: Cerebellum
Brain nuclei	Oxtr transcript number
6Cb	1031
9Cb	900
7Cb	638
PM	513
Crus2	461
Crus1	354
8Cb	288
4&5Cb	283
PFI	224
10Cb	156
Sim	104
2Cb	42
Cop	26
1Cb	19
FI	12

## Sheet: Medulla
Brain nuclei	Oxtr transcript number
10N	1417
Sp5C	550
PCRtA	219
MdD	198
7N	176
vsc	139
SolM	120
IRt	120
sp5	119
12N	98
cu	93
P7	87
MdV	86
Sp5I	61
AP	59
Pr	47
SolIM	44
icp	37
MVePC	33
SolV	32
Cu	27
PMn	23
InM	20
IOC	20
IS	19
LRt	19
py	16
IOB	11
IOD	10
IOK	9
Sp5OVL	9
SolDL	8
SolVL	8
RMg	8
LVe	8
SolI	7
DPGi	7
Gr	6
DMSp5	6
Gi	6
IOBe	5
gr	5
SolC	4
GiA	4
MVeMC	4
Amb	3
SolG	3
VCP	3
SpVe	3
RPa	2
ROb	2
In	2
ECu	2
Sp5ODM	2
SolCe	1
LRtPC	1

## Sheet: Thalamus
Brain nuclei	Oxtr transcript number
PV	1139
PVA	210
IMD	163
MD	144
ic	104
MDM	62
CM	56
MHb	53
fr	46
LGP	42
MGV	40
PC	37
LHb	34
IAD	27
Re	27
LDVL	26
MDL	24
LPMR	21
SubG	17
PIL	16
Xi	14
Rt	14
A13	11
MGD	10
DLG	10
CL	9
VLGPC	8
Po	8
AM	7
VPM	7
VLG	6
MDC	6
VL	6
IAM	5
Rh	5
LDDM	5
APT	5
MGM	4
AVVL	4
Sub	4
Eth	3
VPL	3
VM	3
PT	2
PLi	2
sm	2
VLGMC	2
SG	2
VA	2
Ang	1
AD	1
AVDM	1
REth	1

## Sheet: Forebrain
Brain nuclei	Oxtr transcript number
aci	525
df	390
SFi	179
BSTMPM	96
TS	89
CPu	81
BSTMPI	70
LSD	59
SFO	46
BSTIA	26
BSTMPL	26
AC	17
fmj	16
MPOM	14
BSTS	12
MPOL	10
HDB	9

## Sheet: Midbrain and pons
Brain nuclei	Oxtr transcript number
PAG	375
DpMe	160
InG	77
DpG	61
RPF	56
IPI	55
SNR	47
RLi	45
InWh	39
RPC	39
VTRZ	28
MA3	25
IPF	21
Zo	21
VTA	19
PP	17
csc	16
LT	15
SNL	12
IF	10
Op	10
InCG	8
InC	6
EW	5
MCPC	5
SuG	5
DpWh	4
SNC	4
ml	3
PPT	3
mlf	2
Dk	2
PCom	2
ts	1

[truncated: 1 more sheets: Ventricular system]
