# Supplementary material for: Single transcript level atlas of oxytocin and the oxytocin receptor in the mouse brain
Source: eLife. 2026 Feb 23;15:e95215. doi: 10.7554/eLife.95215 (PMC13008351; doi:10.7554/eLife.95215)
Supplement: Figure 2—source data 1. [file elife-95215-fig2-data1.xlsx]

## Sheet: Brain regions
Brain regions	Oxtr density (transcript/μm2, x 10-3)
Hippocampus	6.11427
Olfactory bulb	4.55429
Hypothalamus	3.57786
Cerebral cortex	3.32275
Ventricular regions	2.36551
Forebrain	1.09594
Medulla	0.978302
Thalamus	0.754437
Midbrain & pons	0.543774
Cerebellum	0.302091

## Sheet: Hippocampus
Brain nuclei	Oxtr density (transcript/μm2, x 10-3)
Py	36.4016
SLu	28.9322
dhc	15.2604
PoDG	10.0978
GrDG	7.54255
f	1.79852
CA3	1.67564
CA2	1.21345
fi	0.866434
S	0.495296
Or	0.470201
DG	0.285964
LMol	0.264739
Mol	0.0630486
CA1	0.0550554

## Sheet: Olfactory bulb
Brain nuclei	Oxtr density (transcript/μm2, x 10-3)
AOD	58.6371
AOM	43.2536
AOV	33.4512
AOL	30.3018
AOE	12.1289
GrO	5.0558
lo	4.4548
G1	3.25867
dlo	2.95647
GrA	1.95456
MiA	1.5465
AOB	0.931665
GIA	0.774894
EPIA	0.705814
Mi	0.500644
EPI	0.187642

## Sheet: Hypothalamus
Brain nuclei	Oxtr density (transcript/μm2, x 10-3)
SO	111.872
PMCo	30.1299
Arc	26.5174
AHiPM	22.0394
mtg	12.14
PaV	10.0642
VMHVL	8.24887
RCh	7.50928
APir	7.31862
I	5.14407
CeL	4.57777
PaAP	4.4963
LaDL	3.38534
MPA	2.76654
BLA	2.70125
SuMM	2.58757
CeMPV	2.38175
ns	2.11403
LA	1.83939
DM	1.83278
PLCo	1.79884
PaMM	1.78529
SuML	1.68872
ACo	1.56354
mt	1.54322
MePV	1.5058
LaVL	1.46843
CeC	1.43505
VMHC	1.37635
VMHDM	1.32251
TC	1.21747
PH	1.14528
AHA	1.12472
AStr	1.09765
SubI	1.01615
PR	0.923896
LH	0.914495
CxA	0.820746
BLV	0.800792
AHP	0.783226
BLP	0.725442
BMP	0.690819
MePD	0.641095
ZIV	0.376709
cp	0.33835
BMA	0.333297
PaLM	0.29466
ZI	0.279724
IM	0.179719
MM	0.13938
La	0.127387
ZID	0.082326
MeAD	0.060099

## Sheet: Cerebral cortex
Brain nuclei	Oxtr density (transcript/μm2, x 10-3)
AIP	10.5344
PrL	9.96567
LPtA	8.29682
DI	7.02418
TeA	5.6438
PRh	5.61699
Ect	5.4414
S1Tr	5.17139
V2ML	5.05708
V1	4.54979
AuV	4.18271
V2L	4.02116
V2MM	3.9396
M2	3.72867
S1DZ	3.55398
AuD	3.49866
S1HL	3.36792
RSA	3.34666
MPtA	3.33371
Au1	3.12893
FrA	2.90788
Pir	2.88969
S1BF	2.87765
Gl	2.81461
LEnt	2.79648
M1	2.72036
LO	2.51643
VO	2.30489
Cg1	2.26235
S1FL	2.21575
S2	2.21527
DEn	2.20087
Cg/RS	1.86739
RSG	1.57018
CI	1.31196
S1ShNc	1.1902
VEn	1.06592
MO	0.792946
Cg2	0.331036

## Sheet: Ventricular system
Brain nuclei	Oxtr density (transcript/μm2, x 10-3)
OV	8.58778
3V	2.80462
SVZ	1.38348

## Sheet: Forebrain
Brain nuclei	Oxtr density (transcript/μm2, x 10-3)
SFO	17.4512
aci	8.06364
df	6.71765
SFi	4.52156
AC	3.99188
BSTIA	3.36503
BSTMPI	2.95583
BSTMPM	2.50417
MPOM	2.31238
MPOL	1.93005
fmj	1.68611
TS	1.67357
LSD	1.31545
HDB	1.19149
BSTMPL	0.85493
BSTS	0.649198
CPu	0.0733261

## Sheet: Medulla
Brain nuclei	Oxtr density (transcript/μm2, x 10-3)
10N	143.353
InM	26.1075
SolV	19.0431
IOK	11.2639
SolM	10.4806
SolI	8.76082
IS	7.84558
cu	6.90532
RPa	6.07
vsc	5.85924
AP	5.37329
P7	5.35069
SolCe	4.18621
SolIM	4.09318
IOBe	2.62771
Pr	2.43007
IOD	2.04377
SolDL	1.96599
7N	1.82239
IOC	1.77875
Amb	1.36917
SolG	1.26899
py	1.21704
12N	1.21202
IOB	1.20523
icp	1.20408
PCRtA	1.18236
Sp5C	1.1821
SolVL	1.13062
SolC	1.11121
gr	1.07434
Gr	0.888293
ROb	0.864057
sp5	0.79442
RMg	0.78487
In	0.780707
LRtPC	0.477953
ECu	0.458113
Sp5I	0.443331
Cu	0.312231
DMSp5	0.291097
MdD	0.271316
MVePC	0.253987
IRt	0.251247
PMn	0.24106
DPGi	0.237566
LVe	0.231569
Sp5ODM	0.229057
VCP	0.190781
MdV	0.151207
GiA	0.132352
LRt	0.132297
SpVe	0.104851
Sp5OVL	0.0984413
MVeMC	0.0431247
Gi	0.034848

## Sheet: Thalamus
Brain nuclei	Oxtr density (transcript/μm2, x 10-3)
PV	19.1915
Xi	16.6627
fr	9.57873
A13	8.90267
PVA	8.04735
MD	6.22121
SubG	3.44541
VLG	2.32716
IMD	2.25712
CM	1.41663
PC	1.06239
IAD	1.02559
MHb	0.92859
MDM	0.886236
PT	0.87971
MDL	0.788738
LHb	0.588061
IAM	0.52418
Rh	0.509228
VLGPC	0.497286
PLi	0.451301
sm	0.450464
Ang	0.401987
MGM	0.385703
AVVL	0.348851
MGV	0.347876
PIL	0.347851
Re	0.339774
ic	0.260182
CL	0.24597
MDC	0.234968
MGD	0.227256
LPMR	0.211288
Sub	0.206902
LDVL	0.189836
AD	0.185061
AVDM	0.171227
Rt	0.139426
LGP	0.129609
AM	0.12754
Eth	0.102074
DLG	0.100898
VLGMC	0.098459
LDDM	0.0781109
REth	0.0668871
SG	0.0645573
VPL	0.0504362
VL	0.0464215
Po	0.0453874
APT	0.037723
VM	0.0339391
VA	0.0307731
VPM	0.0252061

## Sheet: Midbrain and pons
Brain nuclei	Oxtr density (transcript/μm2, x 10-3)
EW	12.6458
IF	11.1376
RPF	7.35758
LT	6.79478
RLi	5.50706
mlf	5.27826
MA3	5.09228
IPF	4.56064
PAG	2.65808
InCG	2.12052
InC	2.1113
MCPC	1.32533
PP	0.992689
VTRZ	0.965956
SNL	0.8134
DpG	0.768993
IPI	0.638032
csc	0.600433
InG	0.396799
SNR	0.340828
InWh	0.327722
RPC	0.321055
Zo	0.314508
VTA	0.268053
Dk	0.235728
ts	0.201661
DpMe	0.195846
DpWh	0.171227
ml	0.14823
SNC	0.143034
Op	0.138711
PCom	0.136866
SuG	0.114076
PPT	0.111752

[truncated: 1 more sheets: Cerebellum]
