# Supplementary material for: Single transcript level atlas of oxytocin and the oxytocin receptor in the mouse brain
Source: eLife. 2026 Feb 23;15:e95215. doi: 10.7554/eLife.95215 (PMC13008351; doi:10.7554/eLife.95215)
Supplement: Figure 3—source data 1. [file elife-95215-fig3-data1.xlsx]

## Sheet: Brain regions
	Number of OXT+ cells
Brain regions	Female			Male
Hypothalamus	372	321	301	228	255	269
Forebrain	114	84	56	74	49	69

## Sheet: Hypothalamus
	Number of OXT+ cells
Brain nuclei	Female			Male
PaMP	118	115	67	27	33	25
PaMM	96	83	114	53	61	57
SO	39	35	50	12	14	9
PaLM	20	28	14	31	55	58
PaPo	20	6	14	39	16	38
SOR	10	14	8	34	55	52
PaAP	17	10	5	0	0	0
LA	19	7	2	2	3	5
TC	10	5	4	16	9	8
AHA	2	5	7	0	0	0
AHP	6	4	3	0	0	0
MeA	4	3	5	4	2	3
LH	4	2	3	0	0	0
AHC	2	3	3	0	0	0
SCh	4	1	1	0	0	0
VMHDM	1	0	1	0	0	0
Arc	0	0	0	10	7	14

## Sheet: Forebrain
	Number of OXT+ cells
Brain nuclei	Female			Male
MPA	60	51	32	6	3	11
BSTMV	23	19	15	0	0	0
AC	23	7	6	0	0	0
MPOM	4	6	1	9	12	19
BSTMPL	2	1	2	0	0	0
LSV	2	0	0	0	0	0
LPO	0	0	0	38	24	18
MPOC	0	0	0	19	8	6
VLPO	0	0	0	2	2	15
