# Supplementary material for: Single transcript level atlas of oxytocin and the oxytocin receptor in the mouse brain
Source: eLife. 2026 Feb 23;15:e95215. doi: 10.7554/eLife.95215 (PMC13008351; doi:10.7554/eLife.95215)
Supplement: Figure 4—source data 1. [file elife-95215-fig4-data1.xlsx]

## Sheet: Pituitary
	Oxtr density (transcript/μm2, x 10-3)
Tissue	Female	Male
Pituitary gland	19.3974	0.412643
