# Supplementary figures and images for: Single transcript level atlas of oxytocin and the oxytocin receptor in the mouse brain
Source: eLife journal article supplement (doi:10.7554/elife.95215), 2026-02-23

# Supplementary Figure 1

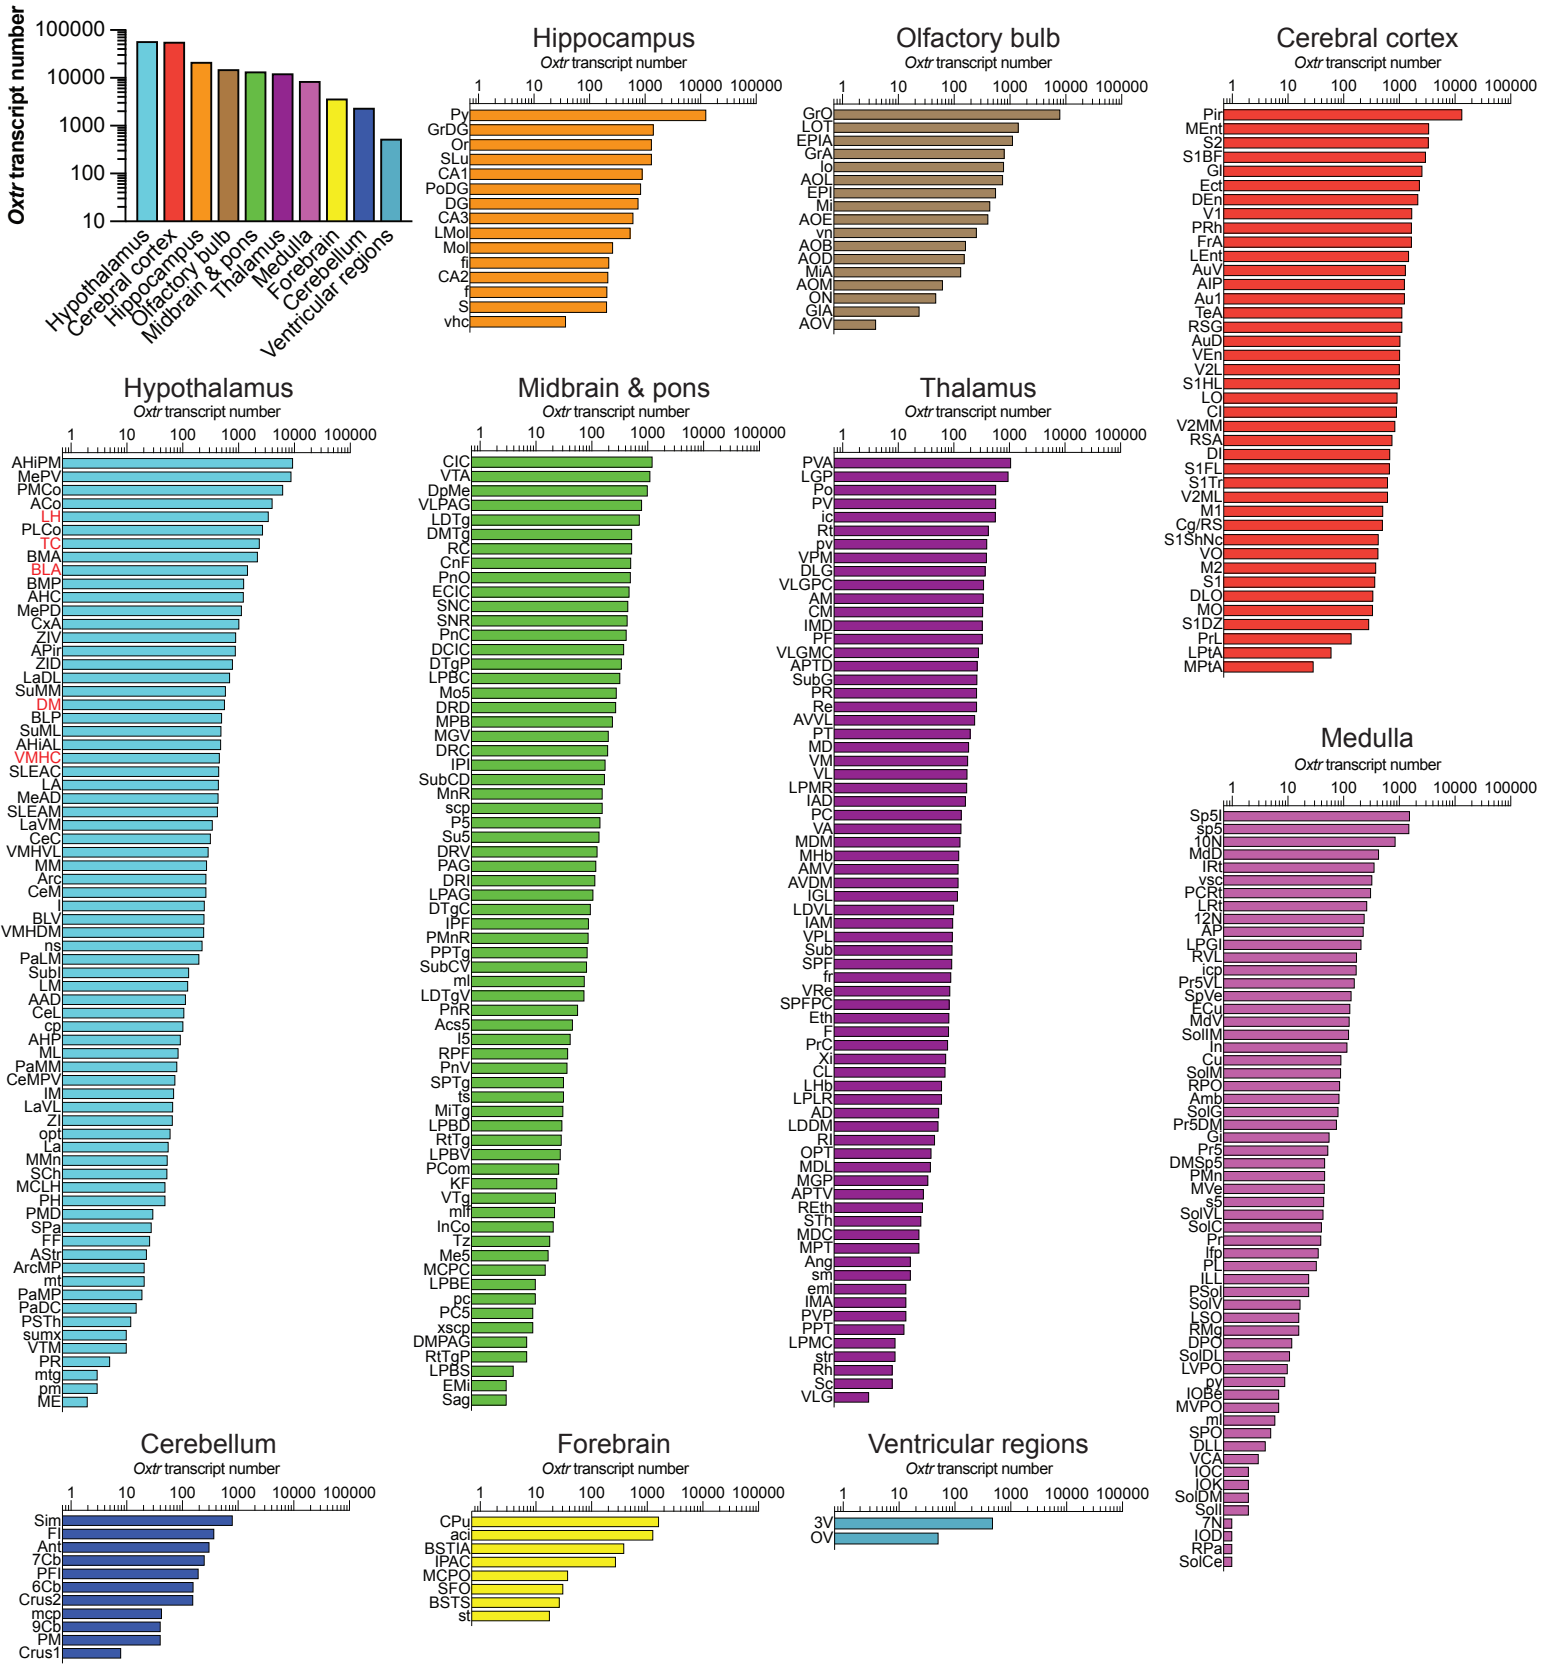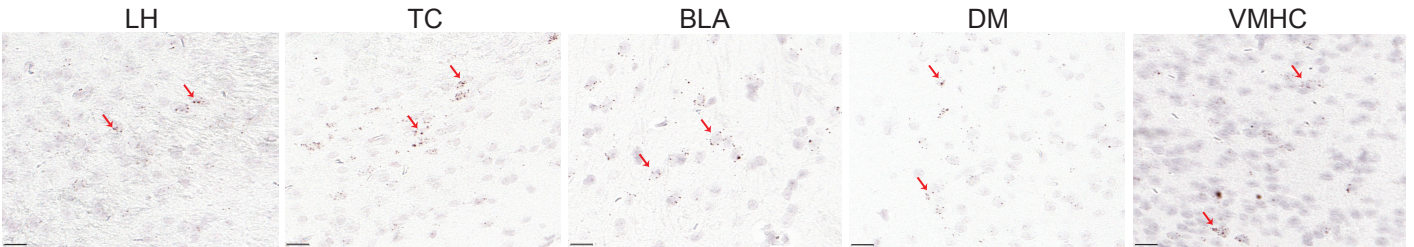

Supplement: supp [file elife_poa_e95215_Figure_1_figure_supplement_1.pdf › elife_poa_e95215_Figure_1_figure_supplement_1.pdf]

## Supplementary Figure 2

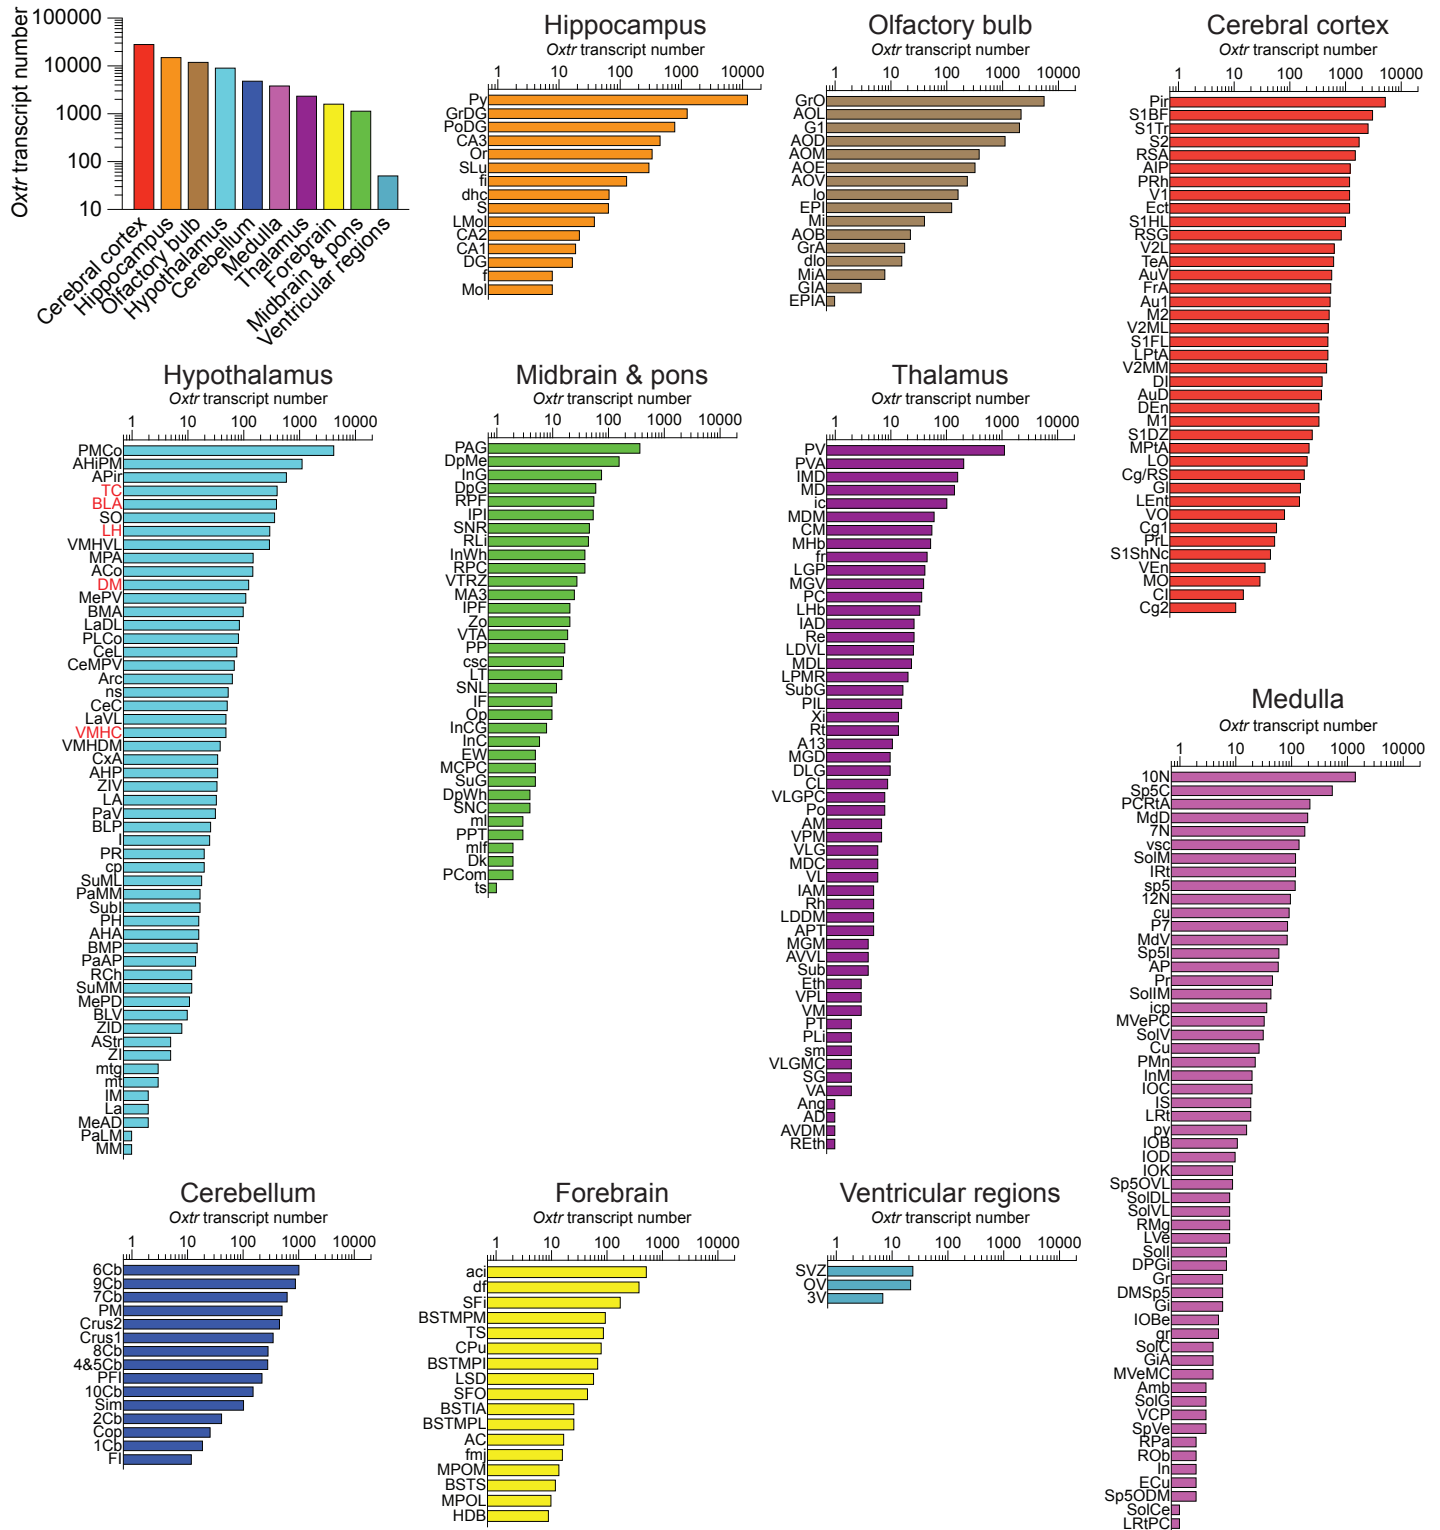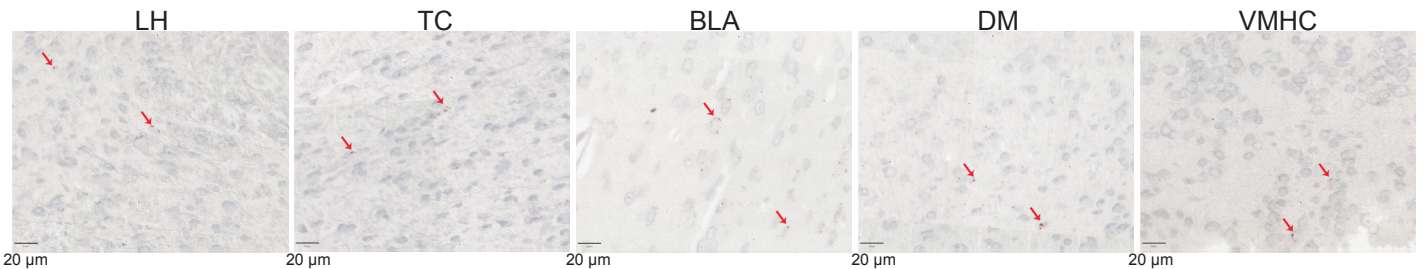

Supplement: supp [file elife_poa_e95215_Figure_2_figure_supplement_1.pdf › elife_poa_e95215_Figure_2_figure_supplement_1.pdf]
